# Supplementary material for: Carbon supported, Al doped-Li3V2(PO4)3 as a high rate cathode material for lithium-ion batteries
Source: Royal Society of Chemistry journal article supplement (doi:10.1039/c2jm00022a), 2012-01-01
Supplement: c2jm00022a.pdf [file c2jm00022a.pdf]

## **Supplementary information**

# **Carbon supported, Al doped-Li<sub>3</sub>V<sub>2</sub>(PO<sub>4</sub>)<sub>3</sub> as high rate cathode material for lithium-ion batteries**

A.R.Cho<sup>a</sup>, J.N. Son<sup>a</sup>, V. Aravindan<sup>a, b</sup>, K.S.Kang<sup>c</sup>, W.S.Yoon<sup>d</sup>, W.S.Kim<sup>e</sup> and Y.S. Lee<sup>a</sup>

<sup>a</sup> Faculty of Applied Chemical Engineering, Chonnam National University,

Gwang-ju 500-757, Korea

<sup>b</sup> Energy Research Institute (ERI@N), Nanyang Technological University, Research Techno  
Plaza, 50 Nanyang Drive, Singapore 637553

<sup>c</sup> Department of Materials Science and Engineering, Seoul National University,  
Seoul 151-742, Korea

<sup>d</sup> Department of Energy Science (DOES), Sungkyunkwan University,  
Suwon 440-746, Korea

<sup>e</sup> Daejung EM co. Ltd, Incheon 405-820, Korea

**Fractional coordinates of C-Li<sub>3</sub>V<sub>1.98</sub>Al<sub>0.02</sub>(PO<sub>4</sub>)<sub>3</sub>**

| Atom | x          | y          | z          | Biso     | occupancy |
|------|------------|------------|------------|----------|-----------|
| Li1  | 0.220(10)  | 0.789(9)   | 0.166(6)   | 2.1(11)  | 1         |
| Li2  | 0.920(9)   | 0.301(9)   | 0.228(6)   | 2.1(11)  | 1         |
| Li3  | 0.548(10)  | 0.425(9)   | 0.194(6)   | 2.1(11)  | 1         |
| V1   | 0.2475(10) | 0.4620(8)  | 0.1095(6)  | 0.62(9)  | 0.974     |
| Al1  | 0.2475(10) | 0.4620(8)  | 0.1095(6)  | 0.62(9)  | 0.0197    |
| V2   | 0.7520(10) | 0.4710(8)  | 0.3898(6)  | 0.62(9)  | 1         |
| P1   | 0.1037(14) | 0.1024(14) | 0.1481(10) | 0.58(11) | 1         |
| P2   | 0.6039(13) | 0.1155(14) | 0.3521(9)  | 0.58(11) | 1         |
| P3   | 0.0353(13) | 0.2479(16) | 0.4928(10) | 0.58(11) | 1         |
| O1   | 0.922(3)   | 0.117(3)   | 0.1470(19) | 0.66(14) | 1         |
| O2   | 0.151(3)   | 0.983(3)   | 0.2372(18) | 0.66(14) | 1         |
| O3   | 0.169(3)   | 0.051(3)   | 0.0418(19) | 0.66(14) | 1         |
| O4   | 0.159(3)   | 0.270(3)   | 0.1898(19) | 0.66(14) | 1         |
| O5   | 0.429(3)   | 0.099(3)   | 0.3301(17) | 0.66(14) | 1         |
| O6   | 0.701(2)   | -0.005(3)  | 0.2810(19) | 0.66(14) | 1         |
| O7   | 0.653(3)   | 0.084(3)   | 0.4702(18) | 0.66(14) | 1         |
| O8   | 0.642(3)   | 0.285(3)   | 0.3130(19) | 0.66(14) | 1         |
| O9   | 0.950(3)   | 0.137(3)   | 0.5664(17) | 0.66(14) | 1         |
| O10  | 0.932(3)   | 0.322(3)   | 0.4046(19) | 0.66(14) | 1         |
| O11  | 0.171(3)   | 0.177(3)   | 0.4309(18) | 0.66(14) | 1         |
| O12  | 0.108(3)   | 0.356(3)   | 0.5755(17) | 0.66(14) | 1         |

**Refinement  
parameters**

|               |          |
|---------------|----------|
| $R_p$         | 8.08 (%) |
| $R_I$ (bragg) | 5.37 (%) |
| $R_F$         | 3.91 (%) |
| $\chi^2$      | 0.306    |

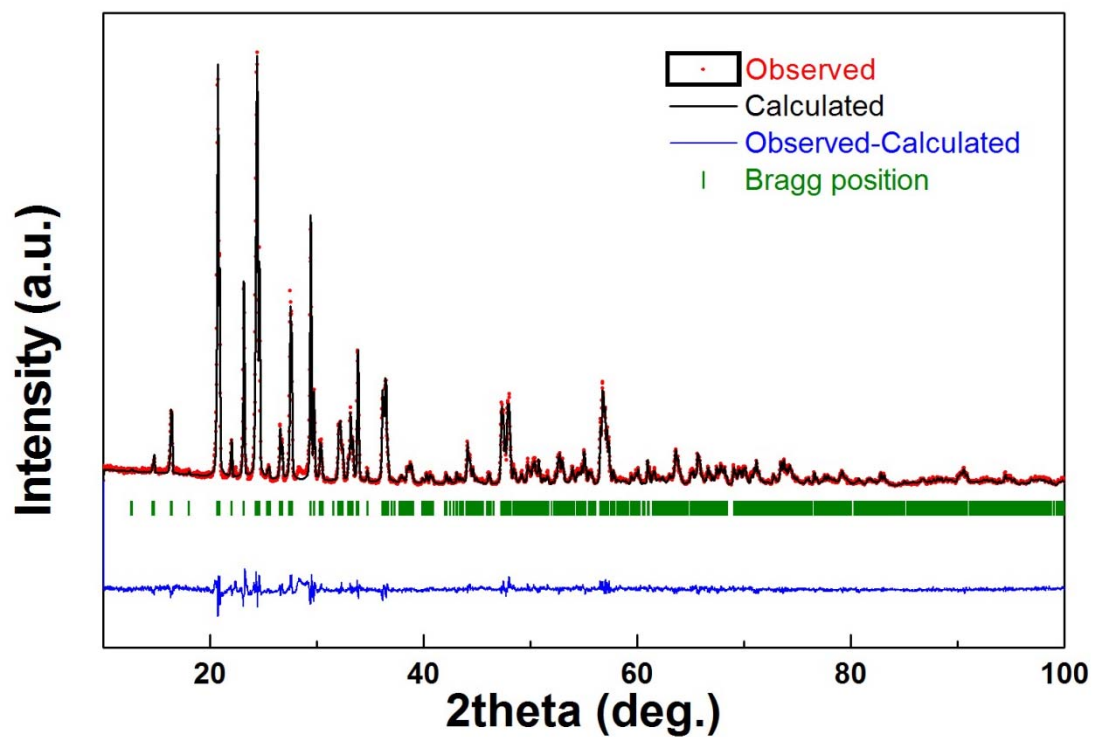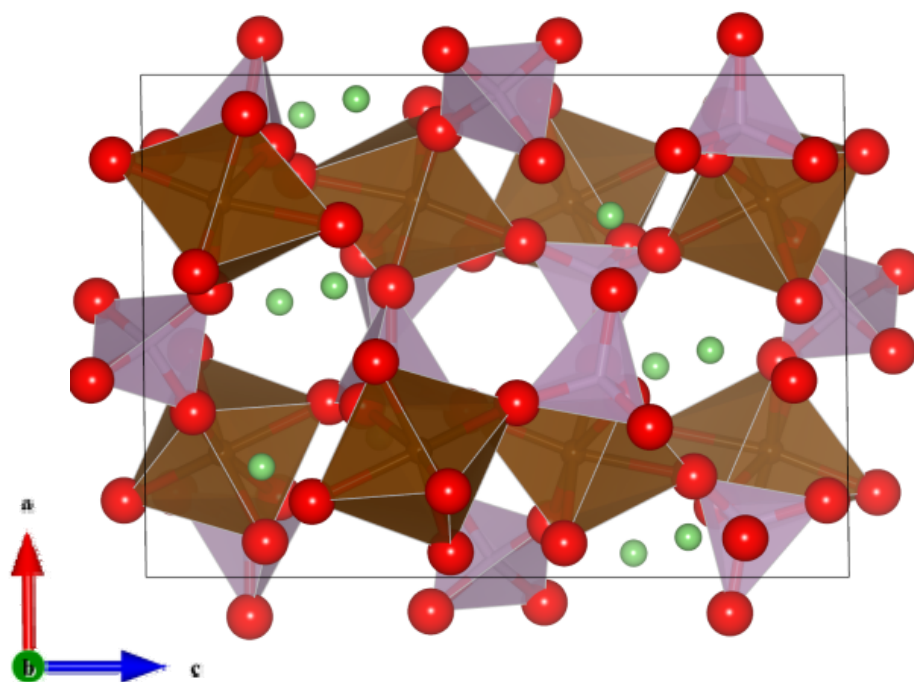

Fig. S2. Rietveld refined powder X-ray diffraction pattern of  $C\text{-Li}_3\text{V}_{1.98}\text{Al}_{0.02}(\text{PO}_4)_3$  with schematic representation of its molecular structure viewed along b axis

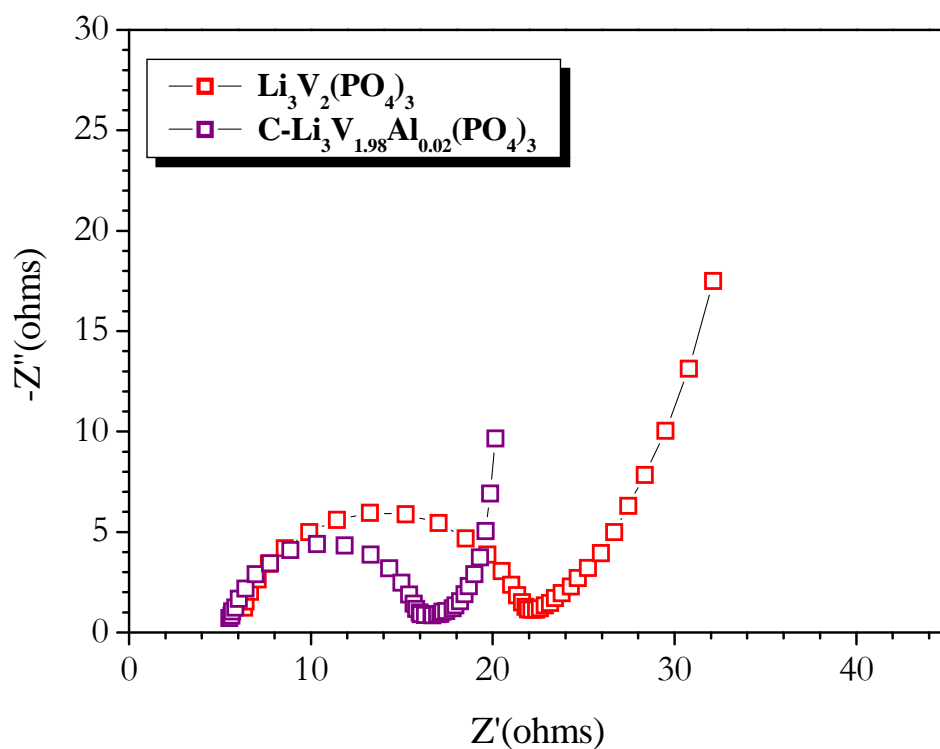

**Fig. S2.** Nyquist plots of (a)  $\text{Li}/\text{Li}_3\text{V}_2(\text{PO}_4)_3$  and (b)  $\text{Li}/\text{C}-\text{Li}_3\text{V}_{1.98}\text{Al}_{0.02}(\text{PO}_4)_3$  cells (adipic acid/total metal ions is 0.15). The Impedance measurement was recorded in the two electrode coin-cell configuration between 100 mHz to 100 kHz.
